# Supplementary material for: Post-Synthetic Modification of an Amino-Functionalized Metal–Organic Framework for Highly In Situ Luminescent Detection of Mercury (II)
Source: MDPI journal article supplement (doi:10.3390/nano13202784), 2023-10-17

## **Supporting Information for**

# **Post-Synthetic Modification of an Amino-Functionalized Met-al–Organic Framework for Highly In Situ Luminescent Detection of Mercury (II)**

Chen Ji, Li Pei, Junyi Qin, Pengyan Wu \*, Nuo Su, Ting Zhang, Yexin Zhang and  
Jian Wang \*

Jiangsu Key Laboratory of Green Synthetic Chemistry for Functional Materials, School  
of Chemistry and Materials Science, Jiangsu Normal University, Xuzhou 221116,  
China.

**Table S1.** XPS elemental compositions (atomic %).

| Entry                            | Atomic % |       |       |      |      |      | Chemical Formula                                                             |                                                                                                                                                                                                                                                |
|----------------------------------|----------|-------|-------|------|------|------|------------------------------------------------------------------------------|------------------------------------------------------------------------------------------------------------------------------------------------------------------------------------------------------------------------------------------------|
|                                  | Zr       | O     | C     | N    | S    | Hg   | Exp.                                                                         | Calcd.                                                                                                                                                                                                                                         |
| UiO-66-NH <sub>2</sub>           | 6.51     | 34.56 | 52.41 | 6.52 |      |      | ZrC <sub>8.05</sub> O <sub>5.31</sub> N                                      | ZrO <sub>0.66</sub> (OH) <sub>0.66</sub> (C <sub>8</sub> O <sub>4</sub> H <sub>3</sub> NH <sub>2</sub> )                                                                                                                                       |
| UiO-66-<br>NSMe                  | 4.35     | 23.39 | 64.23 | 4.37 | 3.66 |      | ZrC <sub>14.77</sub> O <sub>5.38</sub> NS <sub>0.84</sub>                    | [ZrO <sub>0.66</sub> (OH) <sub>0.66</sub> (C <sub>8</sub> O <sub>4</sub> H <sub>3</sub> NH <sub>2</sub> )] <sub>0.16</sub> ·<br>[ZrO <sub>0.66</sub> (OH) <sub>0.66</sub> (C <sub>16</sub> O <sub>4</sub> H <sub>11</sub> NS)] <sub>0.84</sub> |
| UiO-66-<br>NSMe⊃Hg <sup>2+</sup> | 4.21     | 22.65 | 61.8  | 4.25 | 3.50 | 3.59 | ZrC <sub>14.68</sub> O <sub>5.38</sub> NS <sub>0.83</sub> Hg <sub>0.85</sub> |                                                                                                                                                                                                                                                |

For UiO-66-NSMe, the chemical formula is (ZrC<sub>8.05</sub>O<sub>5.31</sub>N)<sub>0.16</sub>·(ZrC<sub>16.05</sub>O<sub>5.39</sub>NS)<sub>0.84</sub>, thus, the PSM extent was calculated as 84%, which is consistent with the result of <sup>1</sup>H NMR (87%).

**Figure S1.** The fluorescence spectra of UiO-66-NSMe in HEPES buffer upon the addition of 0.56 mM of various metal ions.

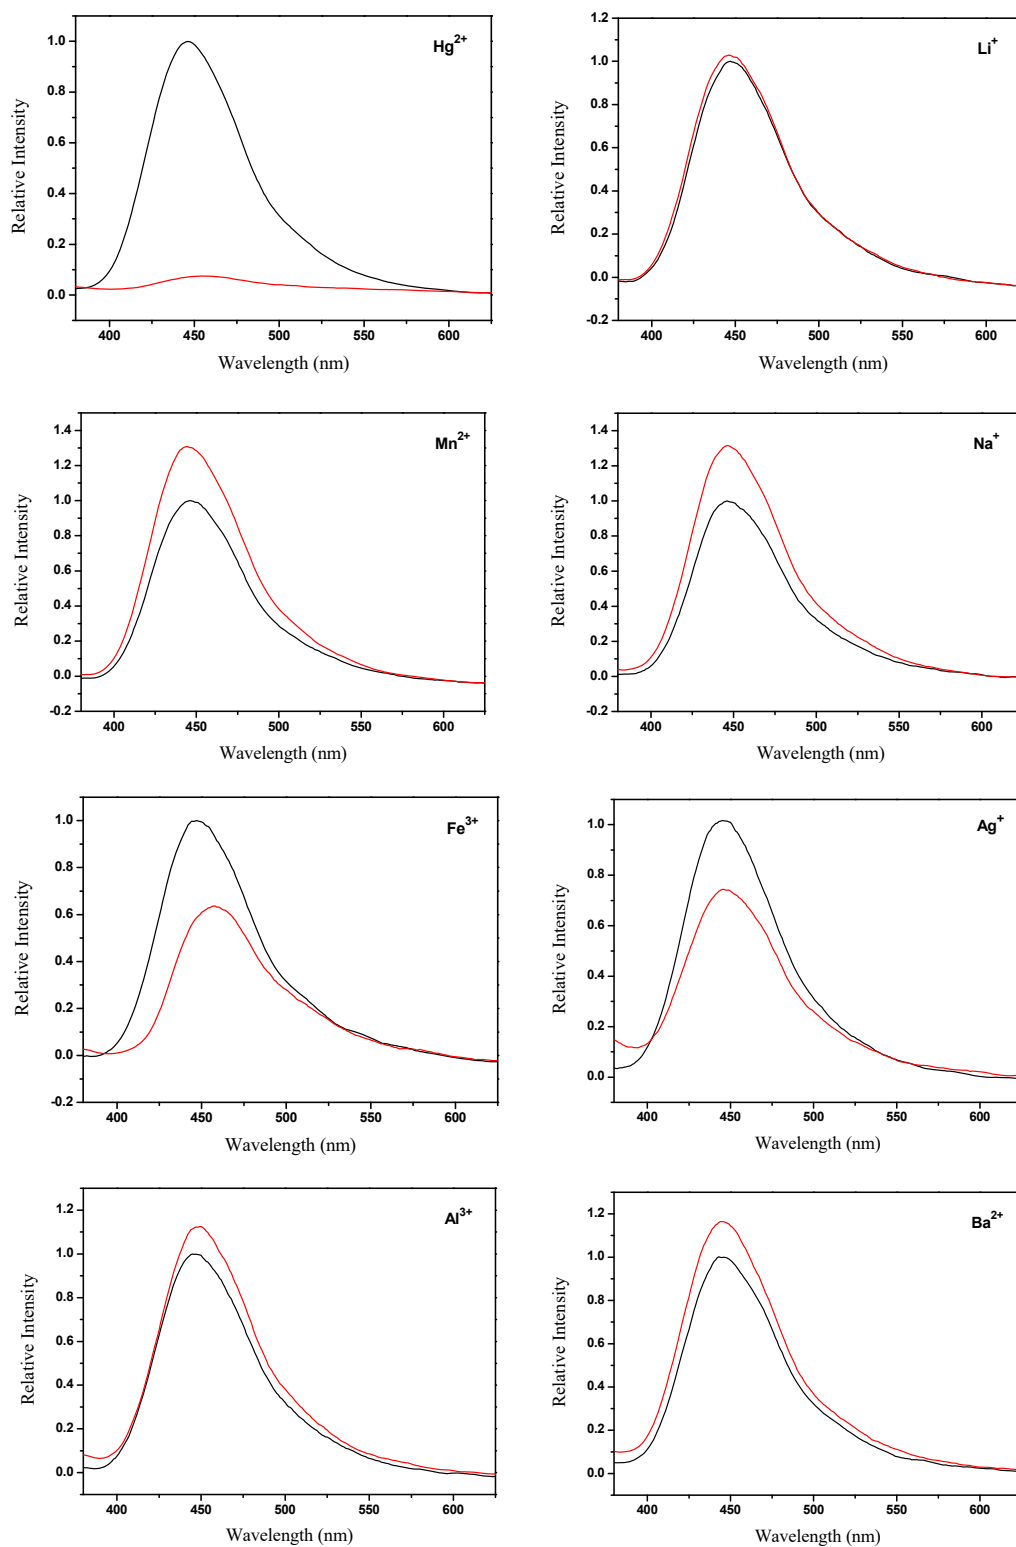

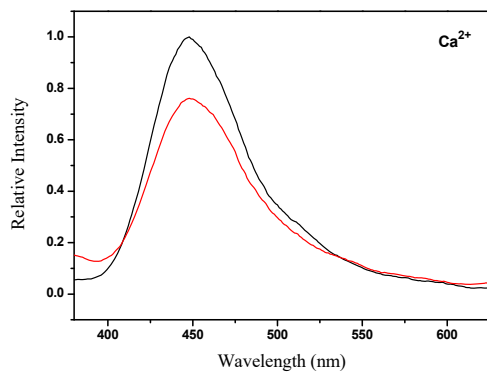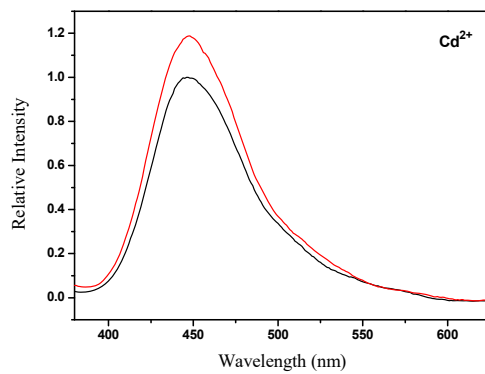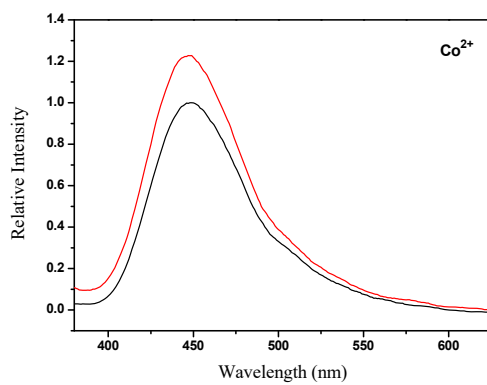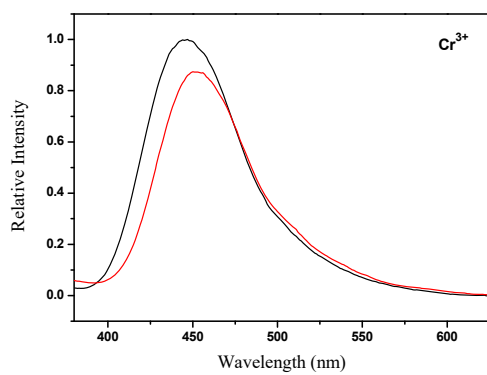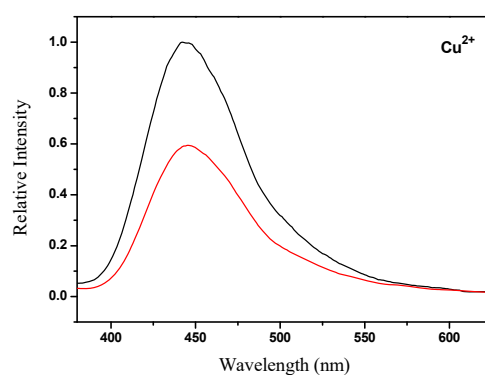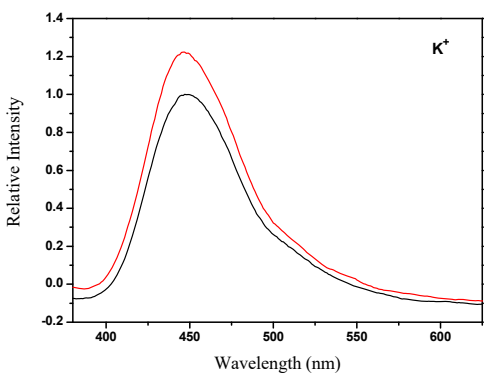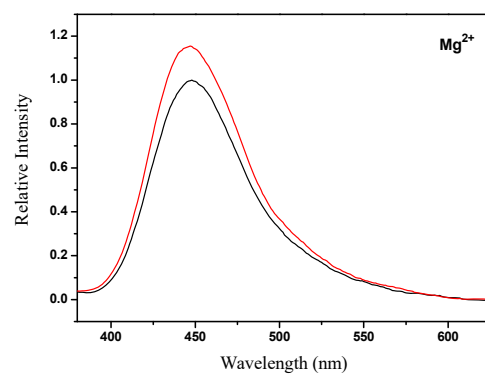

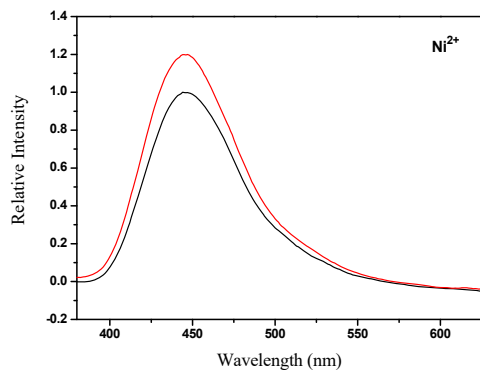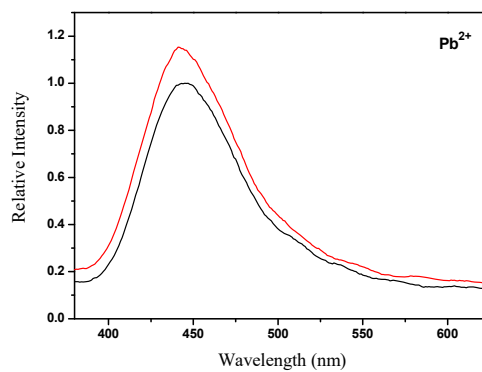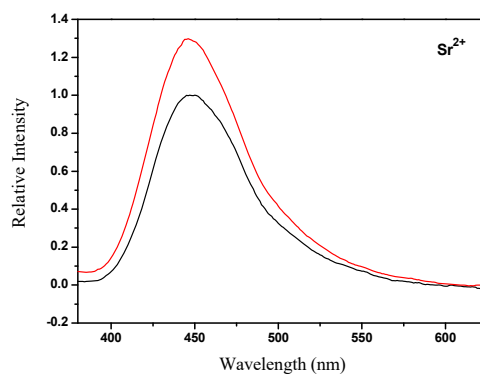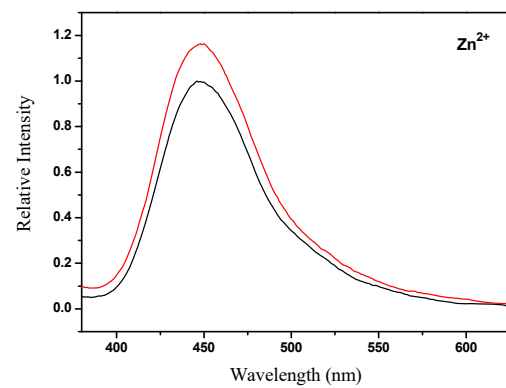

**$^1\text{H}$  NMR Characterization of catalytic products by as-synthesized UiO-66-  
NSMe $\Rightarrow$ Hg $^{2+}$ .**

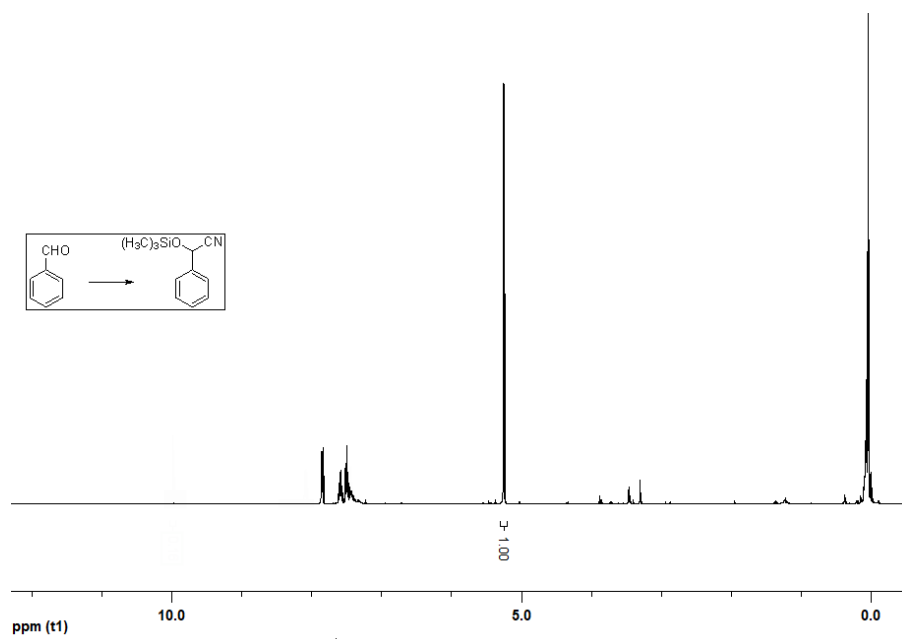

**Figure S2.**  $^1\text{H}$  NMR (400 MHz,  $\text{CDCl}_3$ ) of 2-phenyl-2-(trimethylsilyloxy)-acetonitrile.

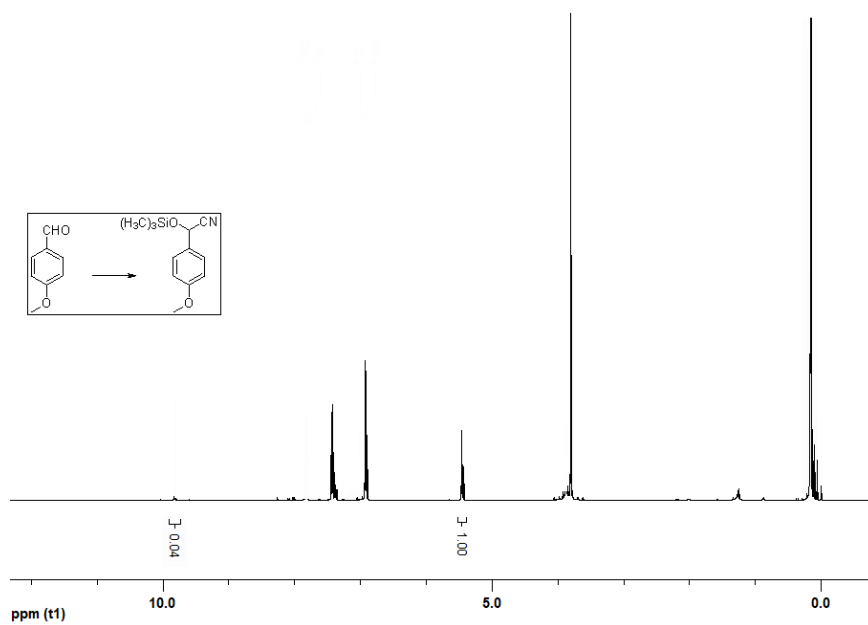

**Figure S3.**  $^1\text{H}$  NMR (400 MHz,  $\text{CDCl}_3$ ) of 2-(4-methoxyphenyl)-2-(trimethylsilyloxy)-acetonitrile.

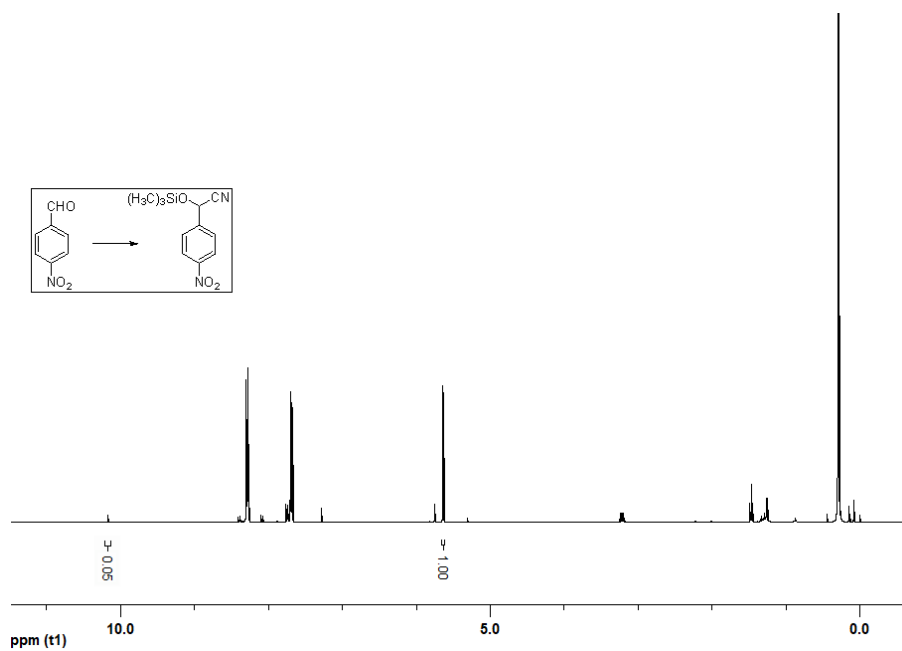

**Figure S4.** <sup>1</sup>H NMR (400 MHz, CDCl<sub>3</sub>) of 2-(4-nitrophenyl)-2-((trimethylsilyl)oxy)-acetonitrile.

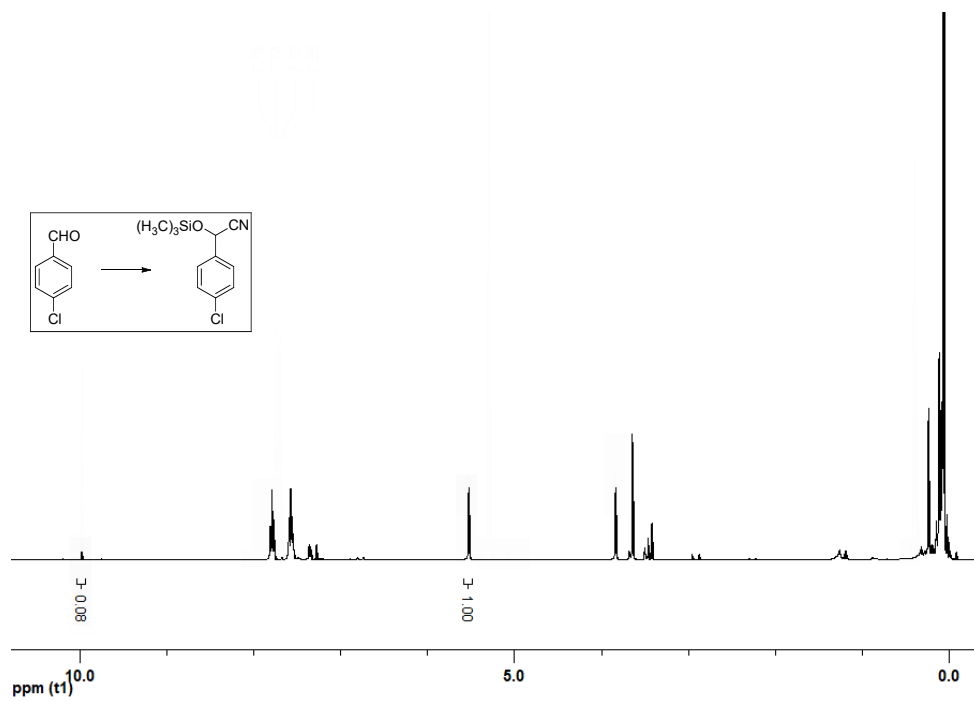

**Figure S5.** <sup>1</sup>H NMR (400 MHz, CDCl<sub>3</sub>) of 2-(4-chlorophenyl)-2-((trimethylsilyl)oxy)acetonitrile.

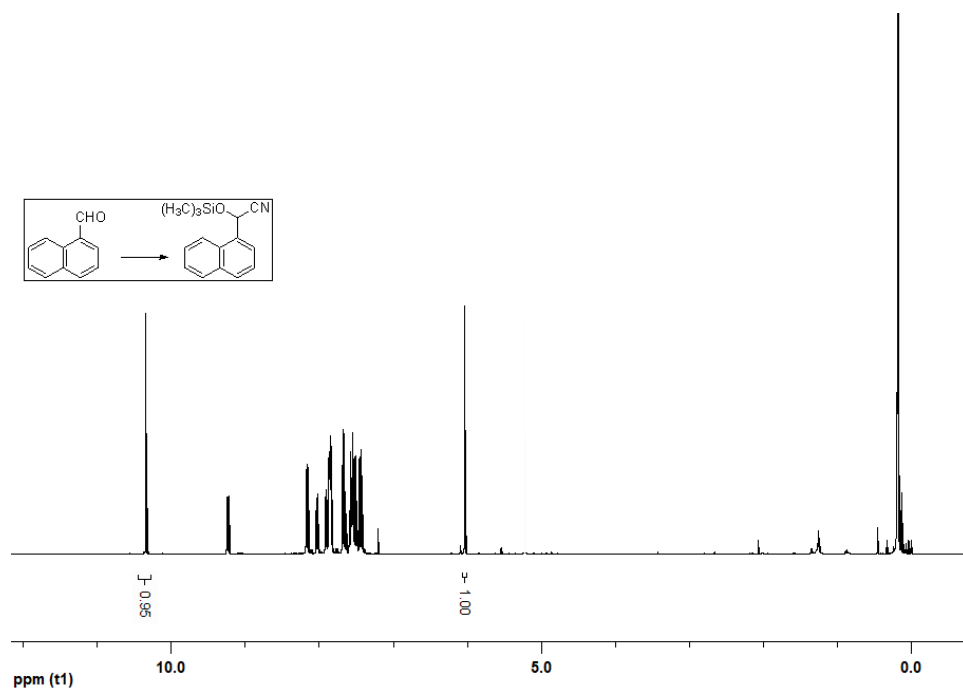

**Figure S6.** <sup>1</sup>H NMR (400 MHz, CDCl<sub>3</sub>) of 2-(naphthalene-1-yl)-2-(trimethylsilyloxy)-acetonitrile.

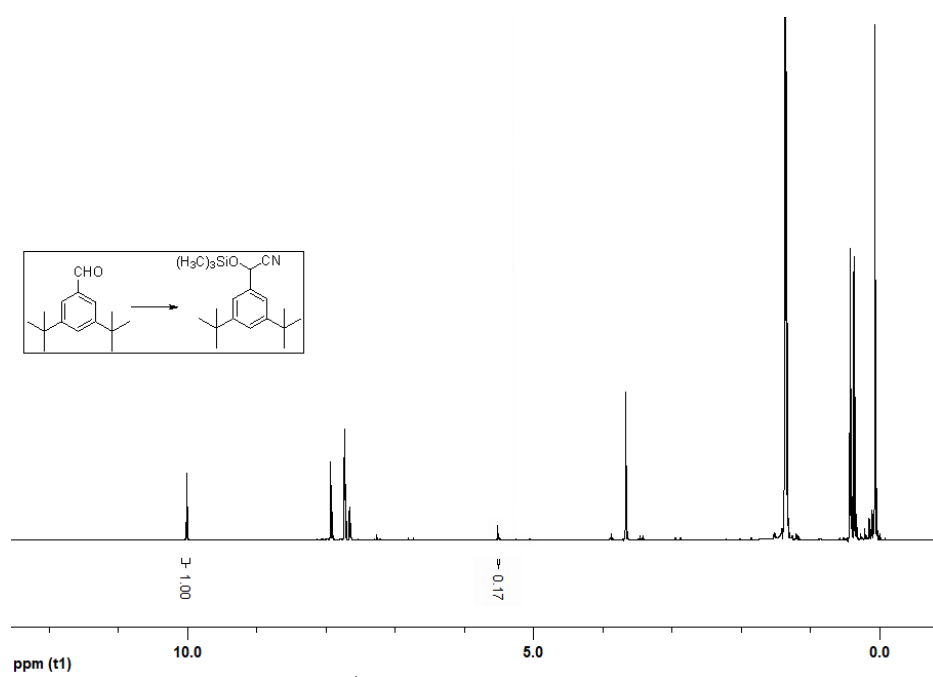

**Figure S7.** <sup>1</sup>H NMR (400 MHz, CDCl<sub>3</sub>) of 2-(3,5-di-tert-butylphenyl)-2-((trimethylsilyl)oxy)acetonitrile.

**Table S2.** The ICP result on the filtrate of UiO-66-NSMe after Hg<sup>2+</sup> detection.

|          |                             |
|----------|-----------------------------|
|          | [Zr <sup>4+</sup> ] (μg/mL) |
| Filtrate | 0.005 ± 0.0003              |

**Figure S8.** The relative fluorescence intensity of UiO-66-NSMe with varying Hg<sup>2+</sup> concentrations.

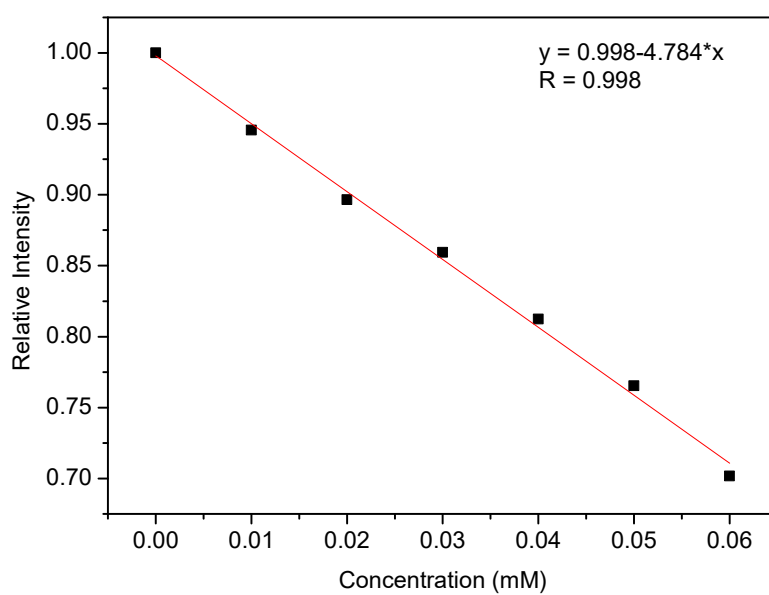

**Figure S9.** Spike test of  $\text{Hg}^{2+}$  by using UiO-66-NSMe in real water samples.

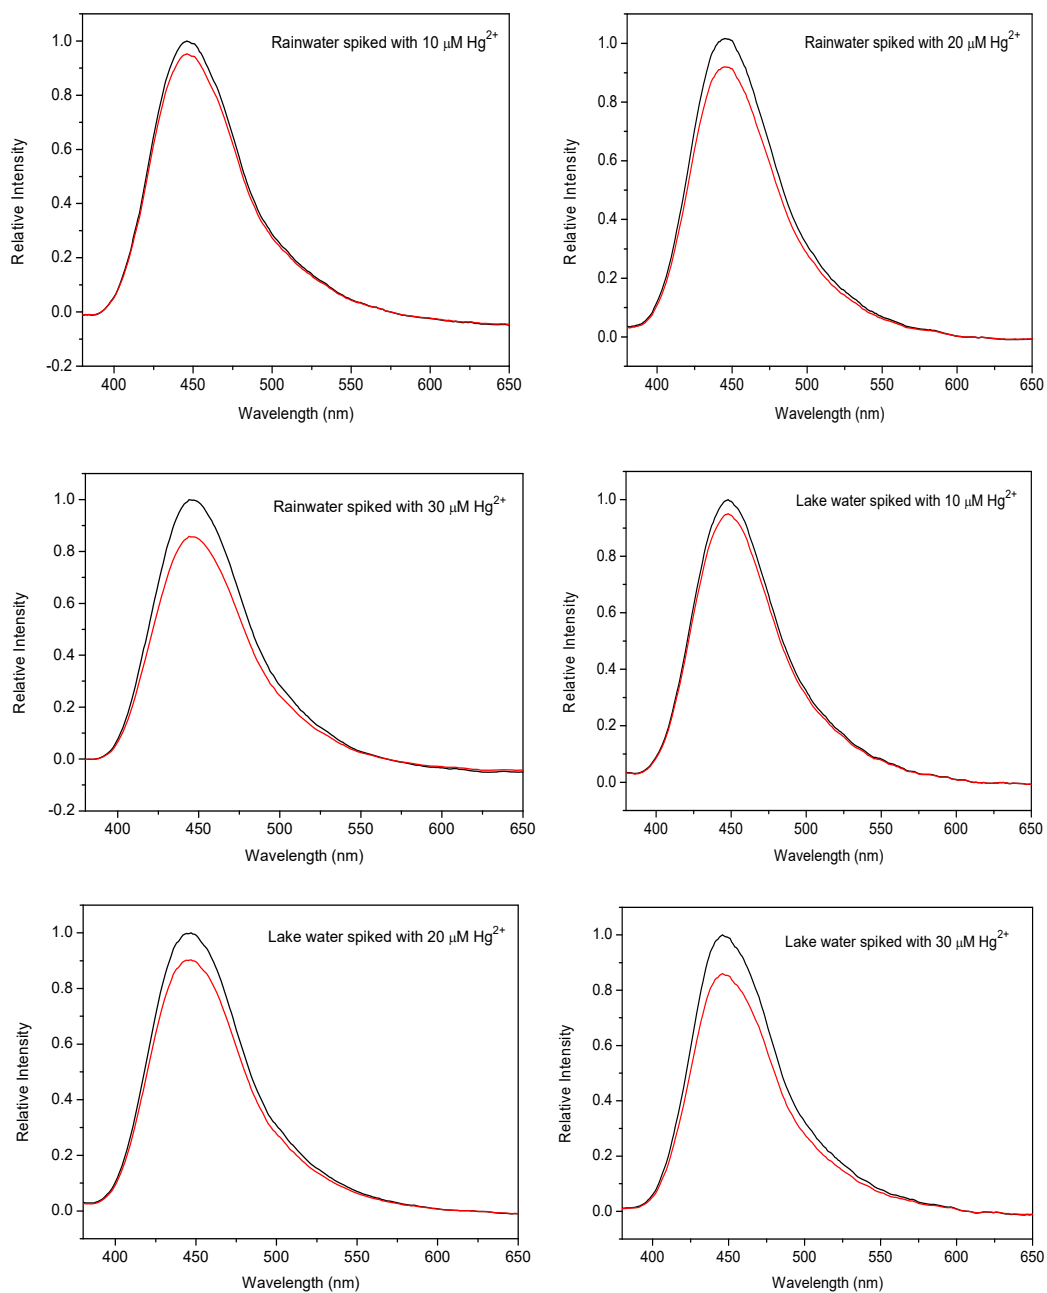

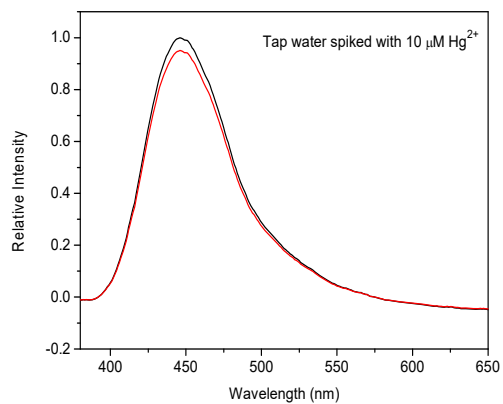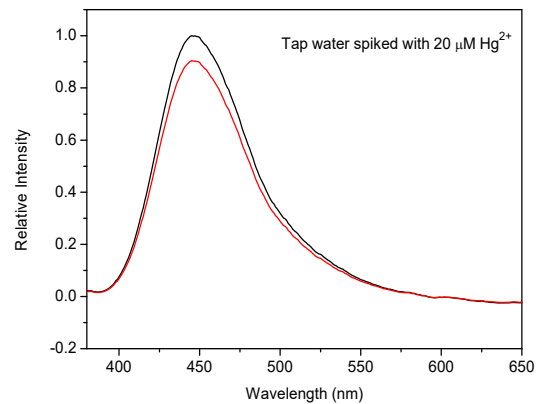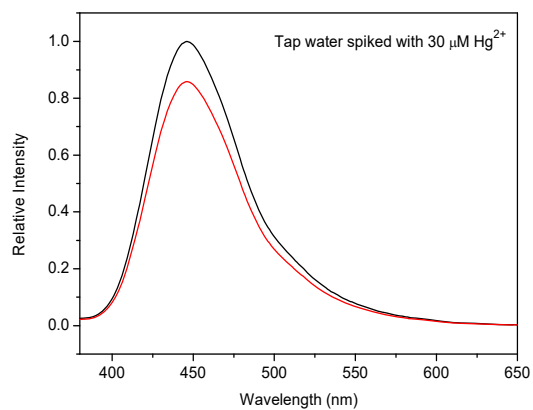

Supplement: s1 [file s1]
